# Supplementary material for: A POM-based copper-coordination polymer crystal material for phenolic compound degradation by immobilizing horseradish peroxidase
Source: Royal Society of Chemistry journal article supplement (doi:10.1039/d1dt02644e), 2021-01-01
Supplement: d1dt02644e1.pdf [file d1dt02644e1.pdf]

# Supporting Information

## **A POM-based copper-coordination polymer crystal material for phenolic compound degradation by immobilizing horseradish peroxidase**

Ying Lu, Tong Zhang, Yue-Xian Zhang, Xiao-Jing Sang, Fang Su\*, Zai-Ming Zhu\*, Lan-Cui Zhang\*

- 1. Selected bond lengths and angles of compounds 1 and 2**
- 2. The standard curves and H<sub>2</sub>O<sub>2</sub> detection**
- 3. Synthesis and crystal structure figures**
- 4. Characterizations**
- 5. Enzyme immobilization and characterization**
- 6. Degradation of phenolic compounds by HRP/1**

## 1. Selected bond lengths and angles of compounds 1 and 2

**Table S1** Selected bond lengths (Å) and angles (°) for compound 1

| Bond          | Length (Å) | Bond        | Length (Å) | Bond       | Length (Å) |
|---------------|------------|-------------|------------|------------|------------|
| Cu1–O21       | 1.878(12)  | Cu2–N3      | 2.010(14)  | P2–O23     | 1.534(14)  |
| Cu1–O24       | 1.970(12)  | Cu2–O22#2   | 2.250(13)  | P2–O22     | 1.549(12)  |
| Cu1–N2        | 1.996(15)  | Cu3–O23     | 1.868(13)  | P2–C31     | 1.807(18)  |
| Cu1–N1        | 2.019(17)  | Cu3–O26     | 1.899(12)  | P3–O26     | 1.509(13)  |
| Cu1–O24#1     | 2.401(12)  | Cu3–N6      | 1.989(16)  | P3–O24     | 1.518(13)  |
| Cu2–O25       | 1.931(11)  | Cu3–N5      | 1.998(15)  | P3–O25     | 1.519(12)  |
| Cu2–N4        | 1.978(17)  | P2–O21      | 1.521(13)  | P3–C41     | 1.827(17)  |
| Cu2–O22       | 1.997(12)  |             |            |            |            |
| Bond          | Angle (°)  | Bond        | Angle (°)  | Bond       | Angle (°)  |
| O24–Cu1–N1    | 173.5(6)   | O25–Cu2–O22 | 92.4(5)    | O23–P2–C31 | 105.0(8)   |
| N2–Cu1–N1     | 80.6(7)    | O23–Cu3–N5  | 165.7(7)   | O21–P2–C31 | 105.9(8)   |
| O24–Cu1–O24#1 | 83.0(5)    | N6–Cu3–N5   | 81.7(7)    | O24–P3–O25 | 114.1(7)   |
| O22–Cu2–N3    | 171.6(6)   | O26–Cu3–N5  | 90.5(6)    | O26–P3–C41 | 105.2(7)   |
| N4–Cu2–N3     | 79.6(6)    | O21–P2–O23  | 114.2(8)   | O24–P3–C41 | 106.7(8)   |

Symmetry transformations used to generate equivalent atom

**Table S2** Hydrogen bonds (Å, °) for compound 1

| D–H···A          | d(D–H)    | d(H···A)  | d(D···A) | <(DHA) (°) |
|------------------|-----------|-----------|----------|------------|
| O1W–H1WA...O4#1  | 0.851(10) | 2.5(2)    | 2.98(3)  | 119(22)    |
| O1W–H1WB...O18   | 0.851(10) | 2.251(10) | 3.01(3)  | 149(5)     |
| O2W–H2WA...O2W#2 | 0.850(10) | 2.150(10) | 2.83(8)  | 137(11)    |
| O2W–H2WB...O10   | 0.850(10) | 2.53(15)  | 3.30(5)  | 152(28)    |

Symmetry transformations used to generate equivalent atoms: #1 -x+1, -y, -z; #2 -x, -y+1, -z

**Table S3** Selected bond lengths (Å) and angles (°) for compound 2

| Bond       | Length (Å) | Bond        | Length (Å) | Bond       | Length (Å) |
|------------|------------|-------------|------------|------------|------------|
| W1–O6      | 1.730(6)   | W2–O1       | 1.961(6)   | Cu1–O11    | 1.966(7)   |
| W1–O3      | 1.826(7)   | W2–O7#1     | 2.153(6)   | Cu1–O1     | 1.972(6)   |
| W1–O7      | 1.833(7)   | W2–O8       | 2.243(6)   | Cu1–N1     | 2.015(9)   |
| W1–O8      | 1.969(6)   | W3–O10      | 1.742(7)   | Cu1–N2     | 2.031(8)   |
| W1–O1      | 2.102(6)   | W3–O4       | 1.807(7)   | Cu1–O1w    | 2.285(8)   |
| W1–O8#1    | 2.328(6)   | W3–O11      | 1.812(7)   | Cu2–O4#1   | 1.899(7)   |
| W2–O9      | 1.738(7)   | W3–O5#1     | 2.086(7)   | Cu2–O2     | 1.907(7)   |
| W2–O2      | 1.810(6)   | W3–O3       | 2.104(6)   | Cu2–N4     | 1.978(9)   |
| W2–O5      | 1.879(7)   | W3–O8#1     | 2.227(6)   | Cu2–N3     | 1.993(9)   |
| Bond       | Angle (°)  | Bond        | Angle (°)  | Bond       | Angle (°)  |
| O6–W1–O8#1 | 176.7(3)   | O2–W2–O1    | 91.7(3)    | O1–Cu1–N1  | 172.7(3)   |
| O7–W1–O1   | 157.9(3)   | O2–W2–O8    | 93.8(3)    | N1–Cu1–N2  | 80.4(3)    |
| O3–W1–O7   | 98.5(3)    | O4–W3–O3    | 156.9(3)   | O11–Cu1–O1 | 91.6(3)    |
| O7–W1–O8   | 92.3(3)    | O10–W3–O8#1 | 164.1(3)   | O2–Cu2–N4  | 165.5(3)   |
| O2–W2–O7#1 | 166.4(3)   | O4–W3–O5#1  | 89.8(3)    | N4–Cu2–N3  | 81.1(4)    |
| O9–W2–O8   | 163.1(3)   | O11–W3–O3   | 86.4(3)    | O2–Cu2–N3  | 92.9(3)    |

Symmetry transformations used to generate equivalent atoms: #1 -x+2, -y+1, -z+1

## 2. The standard curves and H<sub>2</sub>O<sub>2</sub> detection

### (1) The standard curve of HRP

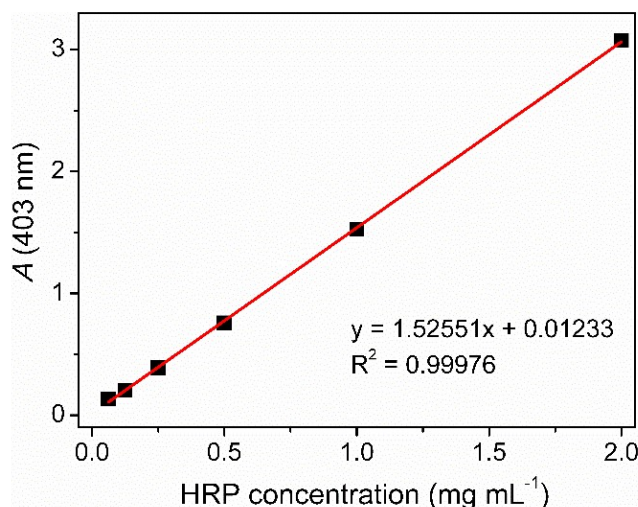

Fig. S1 The standard curve of HRP concentration versus absorbance (403 nm)

### (2) The experiment of H<sub>2</sub>O<sub>2</sub> detection

The experiment of H<sub>2</sub>O<sub>2</sub> detection was performed as follows. 40  $\mu$ L of immobilized enzyme dispersion (pH 4.5, 5 mg mL<sup>-1</sup>) was mixed with H<sub>2</sub>O<sub>2</sub> solution (460  $\mu$ L, pH 4.5, 0.04–0.28 mmol L<sup>-1</sup>) and 500  $\mu$ L of PBS (pH 4.5) containing 4 mmol L<sup>-1</sup> of 4-AAP and 1 mmol L<sup>-1</sup> of phenol. The resulting mixture was reacted for 2 min and centrifuged for 3 min at room temperature, and then the UV-vis absorption spectrum of supernatant was recorded at 510 nm.

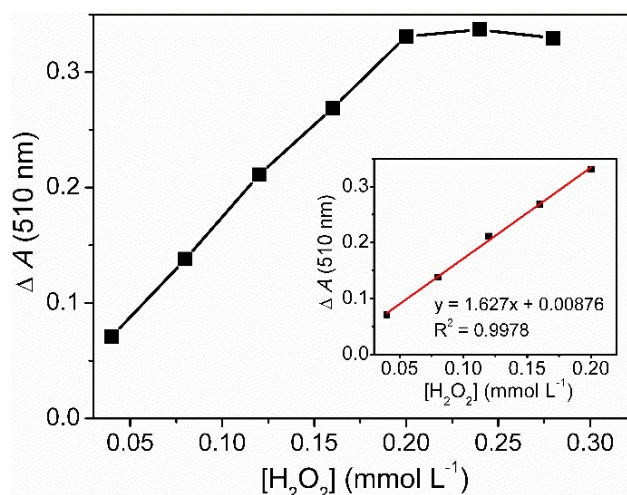

Fig. S2 The linear calibration plot for H<sub>2</sub>O<sub>2</sub> detection using HRP/1 (HRP loading: 268 mg g<sup>-1</sup>) as catalyst.  $\Delta A = A$  (the immobilized HRP, 510 nm) –  $A$  (blank, 510 nm). The reaction time is 5 min

As shown in Fig. S2 (ESI†), the absorbance at 510 nm is increased with increasing the H<sub>2</sub>O<sub>2</sub> concentration from 0.04 to 0.28 mmol L<sup>-1</sup>. A linear relationship is observed between the absorbance and H<sub>2</sub>O<sub>2</sub> concentration ranging from 0.04 to 0.20 mmol L<sup>-1</sup> catalyzed by HRP/1 with a detection limit of  $3.06 \times 10^{-3}$  mol L<sup>-1</sup>. These results confirm that the activity of HRP is retained after immobilization on compound **1**, and HRP/1 is a kind of potential material for H<sub>2</sub>O<sub>2</sub> detection.

### (3) The standard curves of different phenolic compound

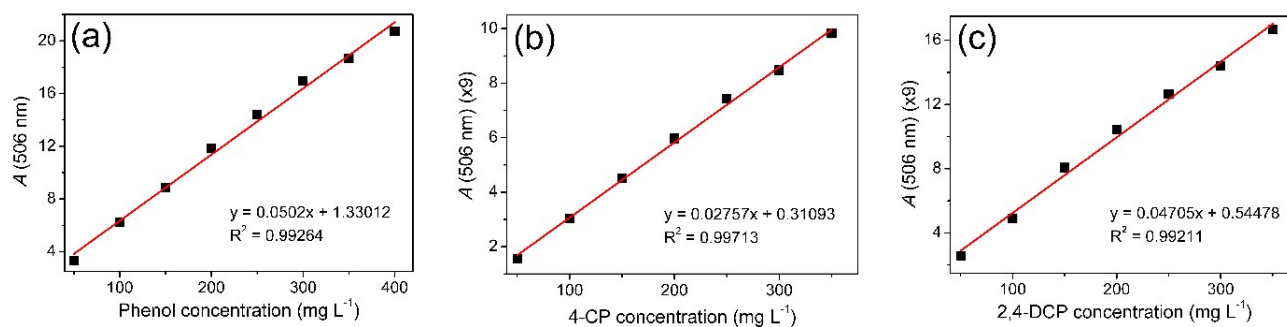

Fig. S3 The standard curves of (a) phenol, (b) 4-CP, (c) 2,4-DCP concentration versus absorbance (506 nm)

### 3. Synthesis and crystal structure figures

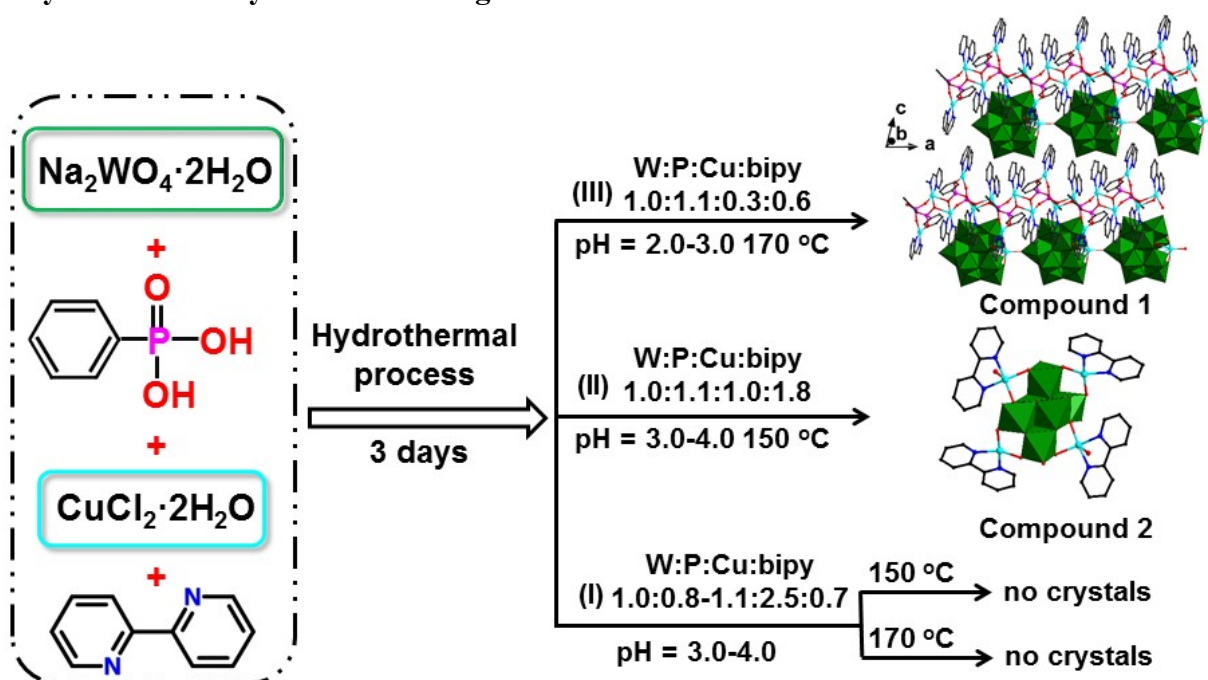

Scheme S1 Schematic representation of the synthetic pathway and conditions of compounds 1 and 2

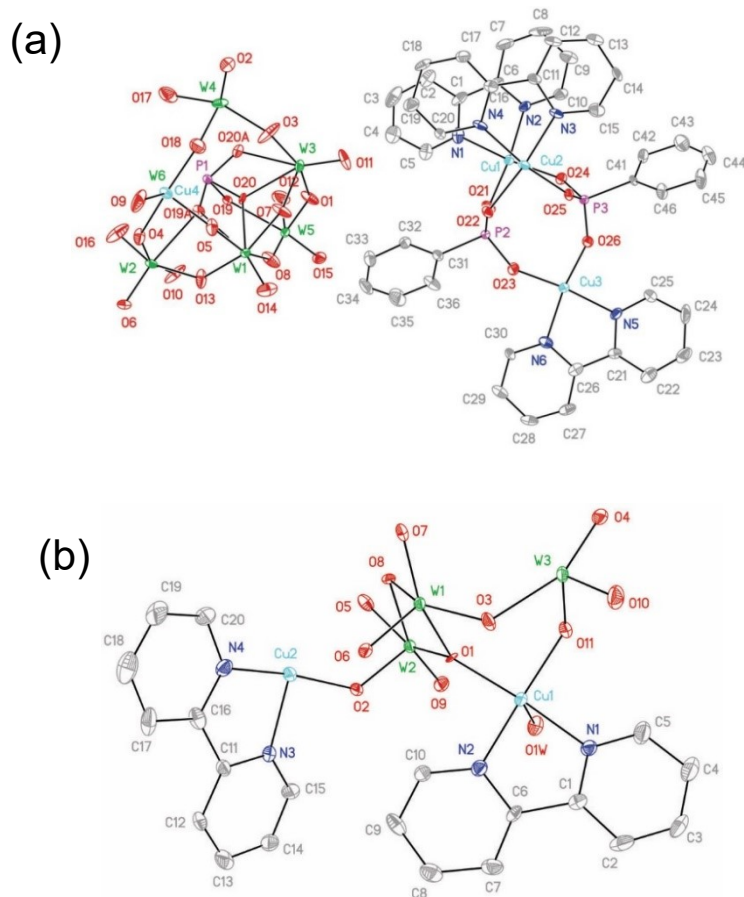

**Fig. S4** (a, b) ORTEP view of the asymmetric unit of compounds **1** and **2** with atom labeling (30% probability displacement ellipsoids; hydrogen atoms and water molecules have been omitted for clarity)

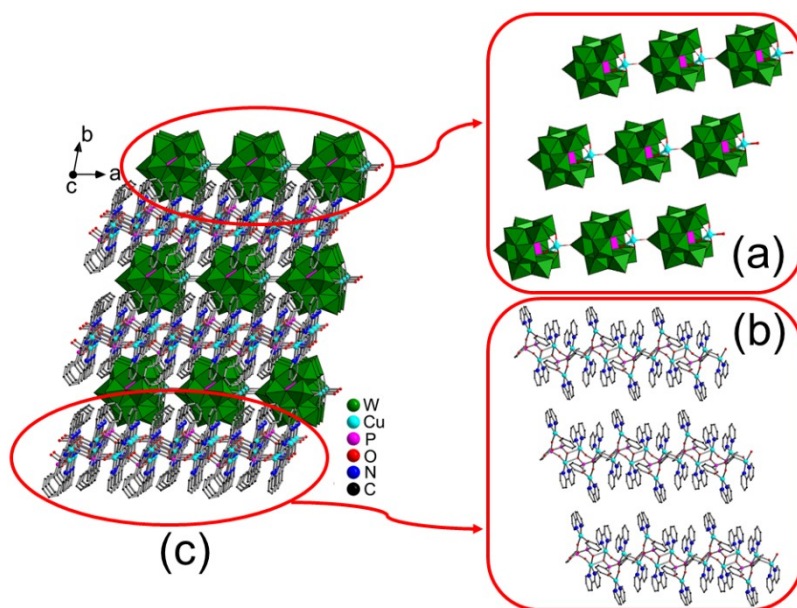

**Fig. S5** (a, b) The arrangement of  $[\text{PCuW}_{11}\text{O}_{39}]^{5-}$  polyoxoanions and  $[\text{((Cu(bipy))}_2(\mu\text{-PhPO}_3)_2\text{Cu(bipy))}_2]^{4+}$  cations, respectively; (c) the packing view of an infinite 3D network of compound **1**

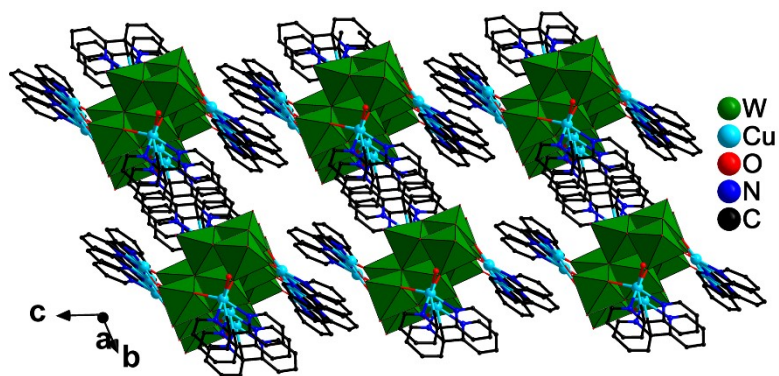

Fig. S6 3D packing diagram of compound 2

#### 4. Characterizations

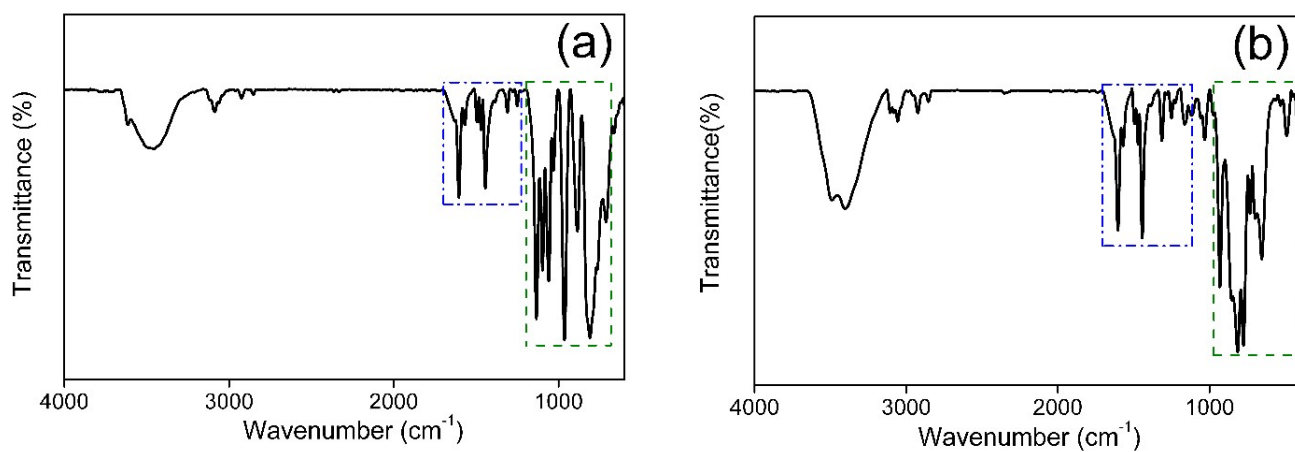

Fig. S7 (a, b) FTIR spectra of compounds 1 and 2

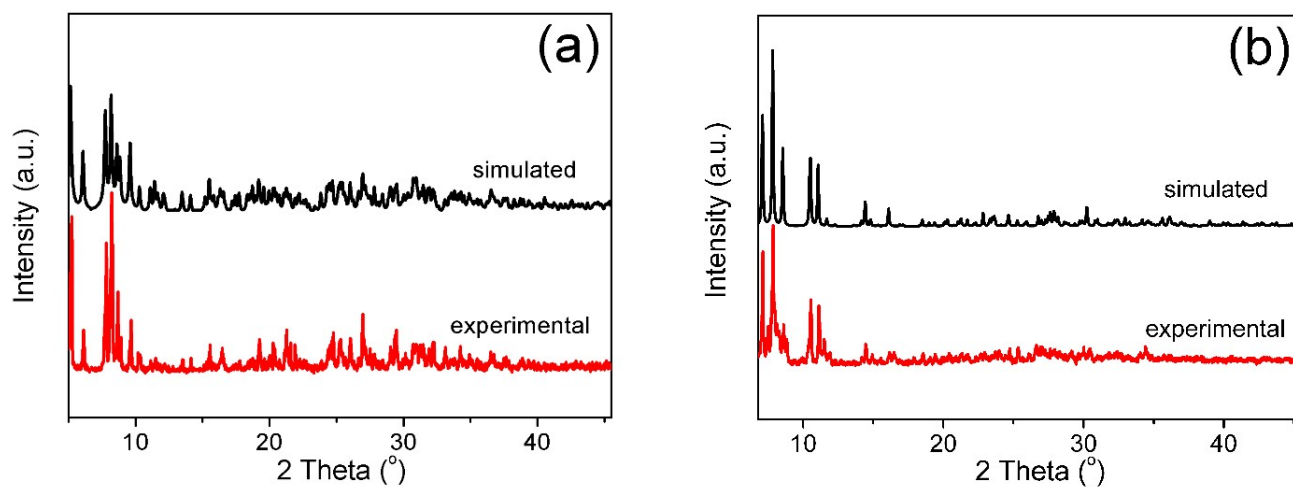

Fig. S8 (a, b) The simulated and experimental PXRD patterns of compounds 1 and 2



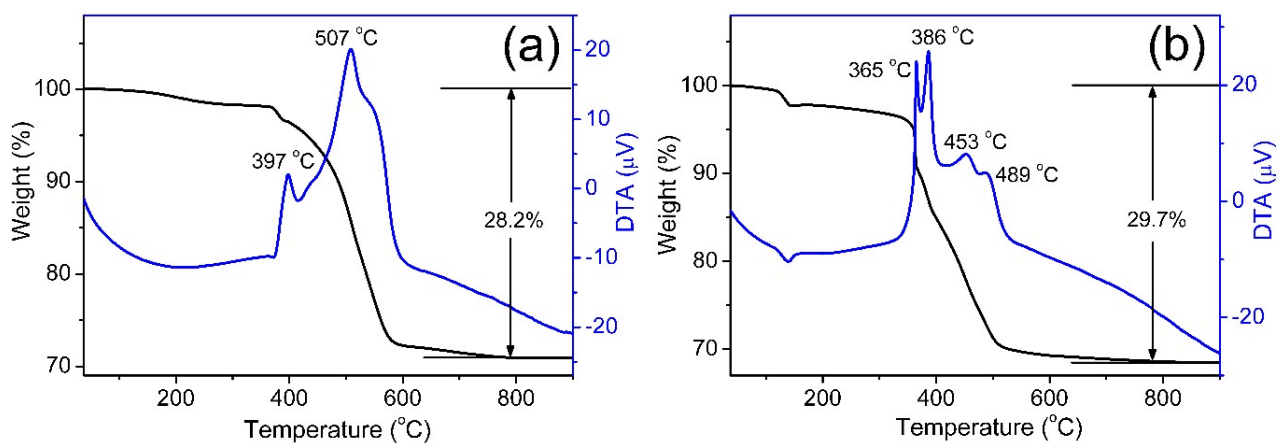

**Fig. S9** (a, b) TG-DTA curves of compounds **1** and **2**

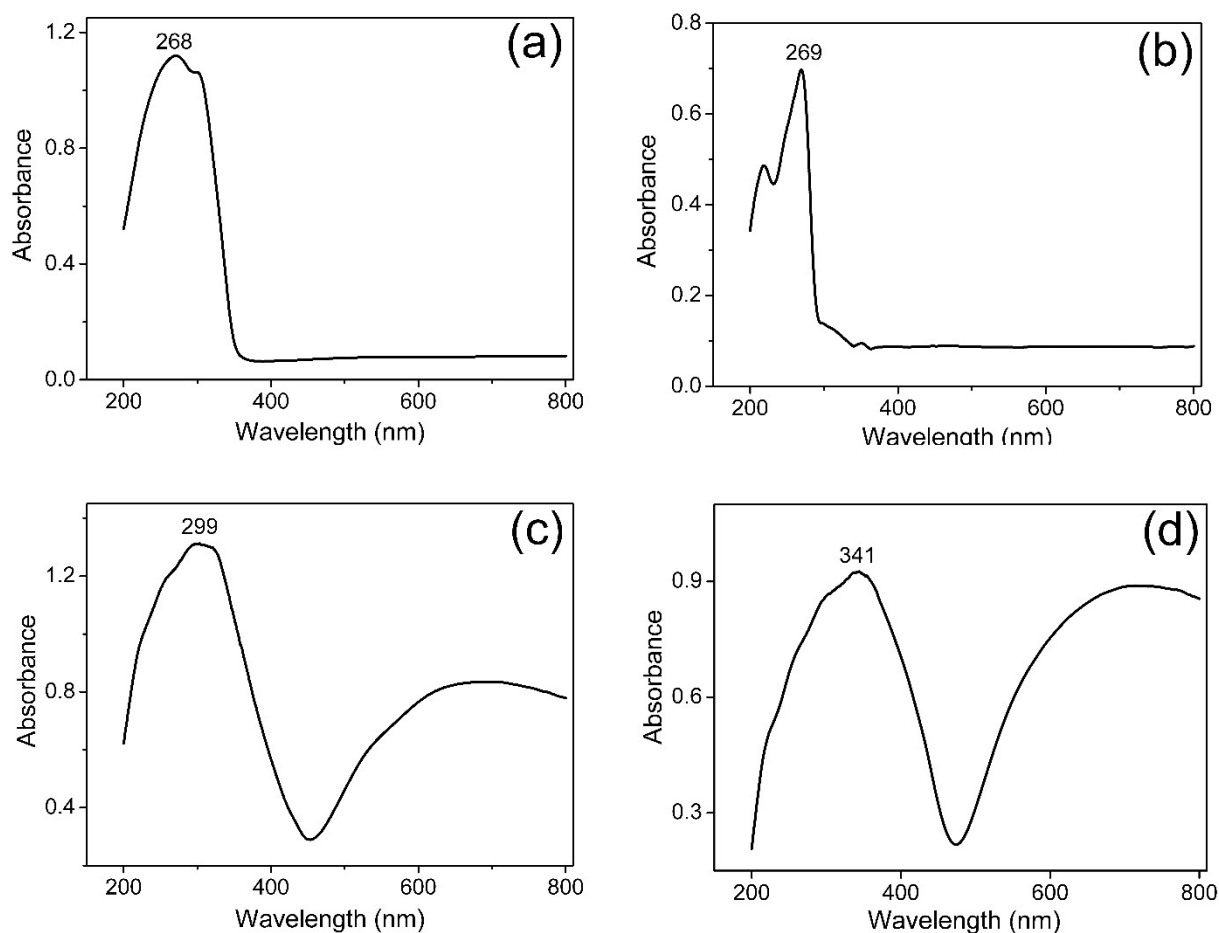

**Fig. S10** (a-d) UV-vis diffuse reflectance spectra of bipy,  $\text{PhPO}_3\text{H}_2$ , compounds **1** and **2**, respectively

## 5. Enzyme immobilization and characterization

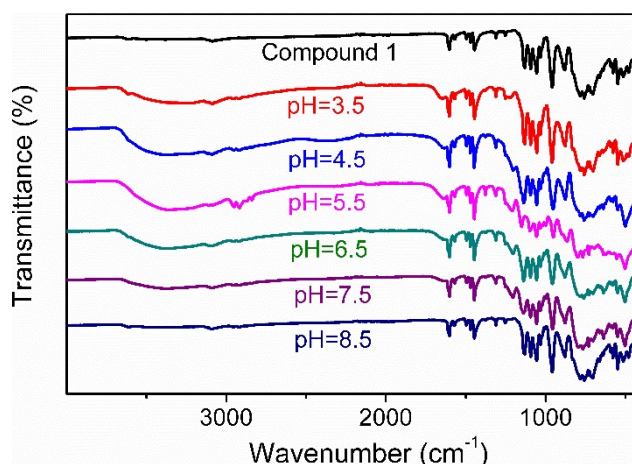

**Fig. S11** FTIR spectra of compound **1** before (crystalline sample) and after (solid powders) soaking in PBS at pH 3.5–8.5 for 24 h

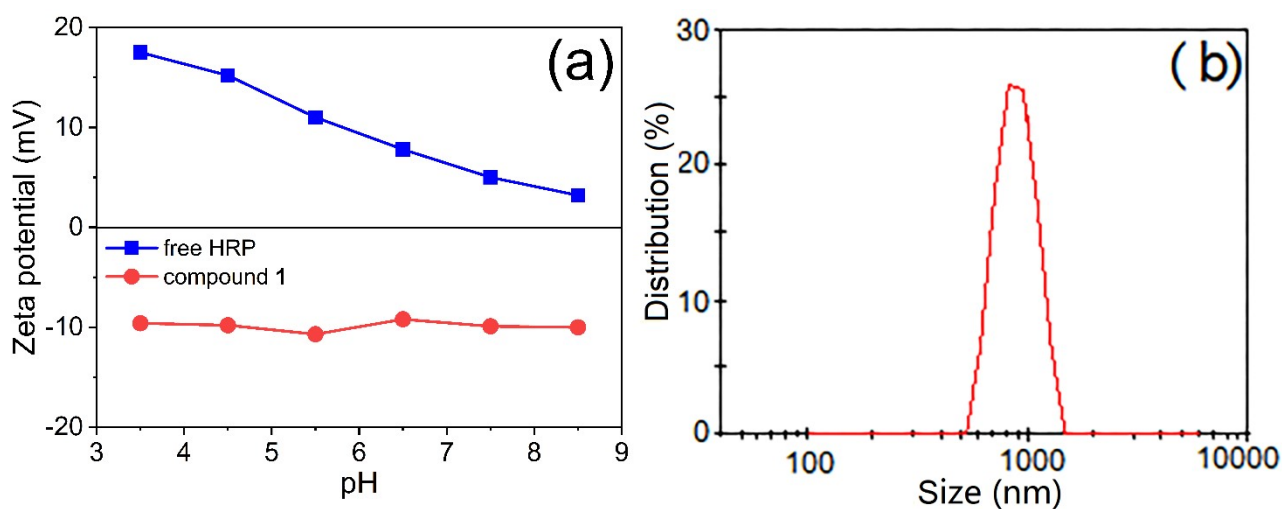

**Fig. S12** (a) Surface zeta potential of free HRP and compound **1** (solid powders) at different pH. (b) The particle size distribution curve of grinded compound **1** powders

Before zeta potential measurement, the grinded compound **1** powder was dispersed in PBS, and then sonicated 15 min to form a uniform suspension with concentration of 0.5 mg mL<sup>-1</sup>. As for free HRP, 1.6 mg mL<sup>-1</sup> of enzyme solution was applied to determine the zeta potential.



**Table S4** The comparison of enzyme loading capacity for different support materials

| Entry | Support material                                                                                                                                                                                                                                                                                                                                                                                                                | Enzyme loading amount (mg g <sup>-1</sup> ) | References |
|-------|---------------------------------------------------------------------------------------------------------------------------------------------------------------------------------------------------------------------------------------------------------------------------------------------------------------------------------------------------------------------------------------------------------------------------------|---------------------------------------------|------------|
| 1     | $\{[\text{Cu}(\text{H}_2\text{biim})_2][\{\text{Cu}(\text{H}_2\text{biim})_2(\mu\text{-H}_2\text{O})\}_2\text{Cu}(\text{H}_2\text{biim})(\text{H}_2\text{O})_2]\text{H}[\{\{\text{Cu}(\text{H}_2\text{biim})(\text{H}_2\text{O})_2\}_{0.5}\}_2(\mu\text{-C}_3\text{HN}_2\text{Cl}_2)\{\text{Cu}(\text{H}_2\text{biim})\}_2]\{\text{Z}(\text{H}_2\text{O})\text{P}_5\text{W}_{30}\text{O}_{110}\}]\cdot x\text{H}_2\text{O}\}_n$ | 157.5–158.7                                 | 26         |
| 2     | $[(\text{TM}(\text{H}_2\text{biim})_2)_2(\text{C}_6\text{H}_5\text{PO}_3)_2\text{Mo}_5\text{O}_{15}]\cdot\text{H}_2\text{O}$                                                                                                                                                                                                                                                                                                    | 95.5–101.7                                  | 27         |
| 3     | $[\text{Cu}_2\text{Mo}_6\text{O}_{20}(\text{C}_6\text{H}_6\text{N}_4)_2(\text{H}_2\text{O})_2]_n$                                                                                                                                                                                                                                                                                                                               | 300.1                                       | 28         |
| 4     | $\{[\text{Zn}(\text{H}_2\text{biim})_2]_3(\text{P}_2\text{W}_{18}\text{O}_{62})\}\cdot 6\text{H}_2\text{O}\}_n$                                                                                                                                                                                                                                                                                                                 | 90.1                                        | 29         |
| 5     | graphene oxide                                                                                                                                                                                                                                                                                                                                                                                                                  | 100                                         | 13         |
| 6     | layered double hydroxides (LDHs)                                                                                                                                                                                                                                                                                                                                                                                                | 0.32                                        | 14         |
| 7     | tyrosine-bridged periodic mesoporous organosilica                                                                                                                                                                                                                                                                                                                                                                               | 2.2                                         | 41         |
| 8     | phosphorus-modified MCM-41                                                                                                                                                                                                                                                                                                                                                                                                      | 154                                         | 42         |
| 9     | $\{((\text{Cu}(\text{bipy}))_2(\mu\text{-PhPO}_3)_2\text{Cu}(\text{bipy}))_2\text{H}(\text{PCuW}_{11}\text{O}_{39})\cdot 3\text{H}_2\text{O}\}_n$                                                                                                                                                                                                                                                                               | 268                                         | This work  |

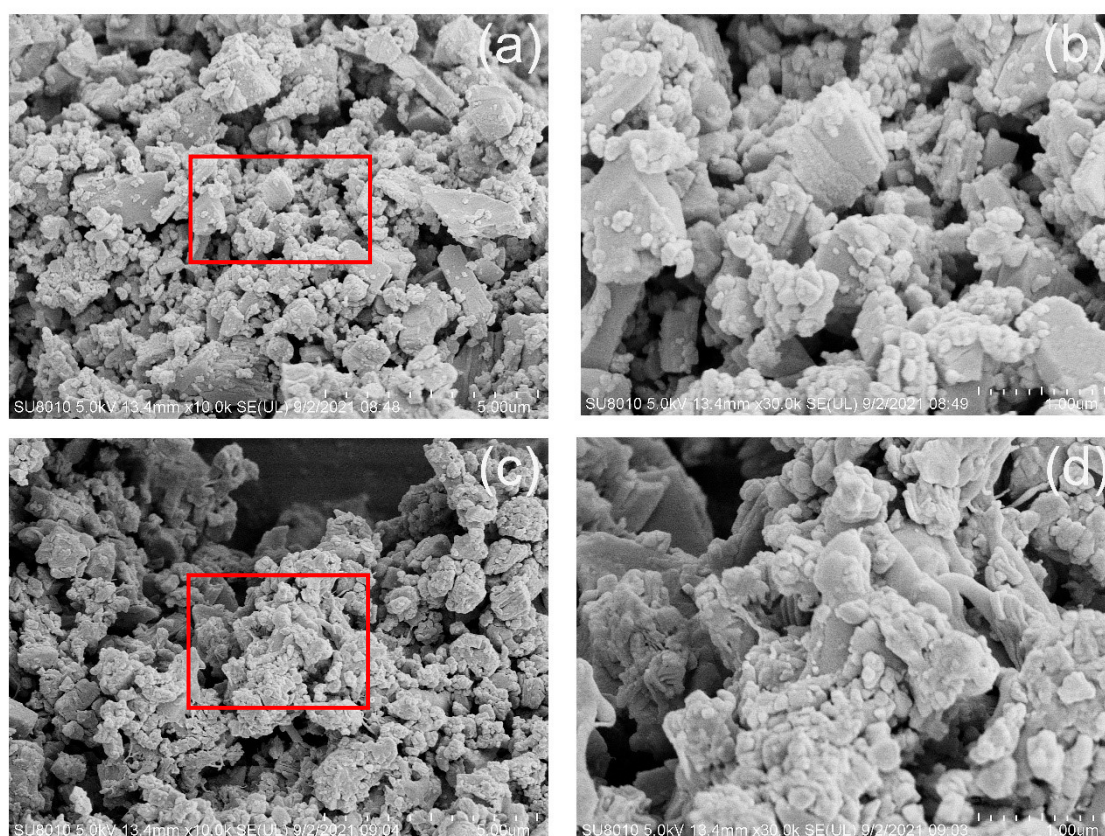**Fig. S13** SEM images of (a, b) grinded compound **1** powders and (c, d) HRP/**1**. b and d are the magnified picture of square area in a and c, respectively

## **6. Degradation of phenolic compounds by HRP/1**

### **(1) Determination of phenolic compound concentration**

The concentration of residual phenolic compound can be determined as follows: 0.20 mL of the degraded solution was diluted to 1.80 mL with PBS (pH 3.5–8.5), and then mixed with 0.30 mL of 16.68 mmol L<sup>-1</sup> K<sub>3</sub>Fe(CN)<sub>6</sub> in 0.25 mol L<sup>-1</sup> NaHCO<sub>3</sub>, as well as 0.30 mL of 4.16 mmol L<sup>-1</sup> 4-AAP in 0.25 mol L<sup>-1</sup> NaHCO<sub>3</sub>. The mixed solution was reacted for 5 min at room temperature and monitored the absorbance (506 nm) by UV-vis spectrophotometer (Fig. S3, ESI†).

## (2) The degradative activity of HRP/1 towards different phenolic compounds

**Table S5** The comparison of phenolic pollutant removal efficiency for various immobilized enzyme

| Entry | Enzyme                   | Support material                                                                                                                                                | Pollutants/Concentration<br>(mg L <sup>-1</sup> ) | Reaction time | Removal efficiency<br>(%) | References             |
|-------|--------------------------|-----------------------------------------------------------------------------------------------------------------------------------------------------------------|---------------------------------------------------|---------------|---------------------------|------------------------|
| 1     | HRP                      | {((Cu(bipy)) <sub>2</sub> (μ-PhPO <sub>3</sub> ) <sub>2</sub> Cu(bipy)) <sub>2</sub> H<br>(PCuW <sub>11</sub> O <sub>39</sub> )·3H <sub>2</sub> O} <sub>n</sub> | Phenol/400                                        | 30 min        | 90.5 (TOC: 73.6)          | This work <sup>a</sup> |
|       |                          |                                                                                                                                                                 | 2,4-DCP/400                                       |               | 96.9 (TOC: 78.3)          |                        |
|       |                          |                                                                                                                                                                 | 4-CP/400                                          |               | 97.0 (TOC: 75.2)          |                        |
| 2     | HRP                      | Polyacrylonitrile-based beads                                                                                                                                   | 2,4-DCP/282                                       | 12 h          | 90.0                      | 45                     |
| 3     | HRP                      | Carbon nanospheres                                                                                                                                              | Phenol/94                                         | 90 min        | 43.1                      | 46                     |
|       |                          |                                                                                                                                                                 | 2,4-DCP/94                                        |               | 95.0                      |                        |
| 4     | HRP                      | layered double hydroxides                                                                                                                                       | Phenol/25                                         | 7 h           | 25                        | 14                     |
|       |                          |                                                                                                                                                                 | Phenol/10                                         |               | 89.5                      |                        |
| 5     | Laccase                  | Heterophase TiO <sub>2</sub> microspheres                                                                                                                       | 2,4-DCP/10                                        | 3.5 h         | 85.9                      | 47 <sup>c</sup>        |
| 6     | RSVNP-CLEAs <sup>d</sup> | —                                                                                                                                                               | Phenol/100                                        | 1 h           | 92 (TOC: 78)              | 2                      |

<sup>a</sup>Reaction conditions: 5.0 mg HRP/1 (268 mg g<sup>-1</sup>), H<sub>2</sub>O<sub>2</sub>/phenol molar ratio of 2.3: 1, pH 7.5, reaction time of 30 min and temperature of 25 °C

<sup>b, c</sup>Photo-enzyme integrated catalysis process

<sup>d</sup>RSVNP: peroxidase isolated from *Raphanus sativus* var. *niger*; RSVNP-CLEAs: RSVNP was immobilized as a cross-linked enzyme aggregate (CLEAs)

### (3) The effect of H<sub>2</sub>O<sub>2</sub> on degradation of phenol in absence of catalyst

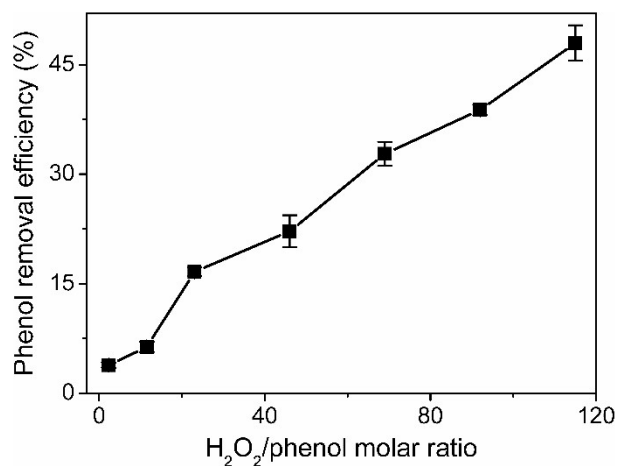

**Fig. S14** Influence of H<sub>2</sub>O<sub>2</sub> initial concentration on degradation of phenol (10 mL, 400 mg L<sup>-1</sup>) without catalyst at pH 7.5. The amounts of fresh 30% H<sub>2</sub>O<sub>2</sub> are 10, 50, 100, 200, 300, 400 and 500  $\mu$ L, that is, the final H<sub>2</sub>O<sub>2</sub> concentrations in the reaction solution are about 9.8, 48.7, 97.0, 192.0, 285.3, 376.7 and 466.4 mmol L<sup>-1</sup> ( $n(\text{H}_2\text{O}_2/\text{phenol}) = 2.3: 1, 11.5: 1, 23: 1, 46: 1, 69: 1, 92: 1, 115: 1$ ), respectively. Reaction time, 30 min
